# Supplementary material
Source: PubMed Central journal article supplement (PMC5980384)
Supplement: koni-07-06-1431088-s001.pdf [file koni-07-06-1431088-s001.pdf]

## Supplementary Figure Legends

### Supplementary Figure S1. Improved cytokine polyfunctionality in T cells

**following co-blockade of RANKL with PD-1 and CTLA4.** Groups of BALB/c WT mice (n= 5-10/group) were injected with  $2 \times 10^5$  CT26 colon carcinoma cells. On day 10 after tumor inoculation, mice were randomized into groups bearing equivalent median tumor size and were treated i.p with a single dose of antibody as indicated: clg (200  $\mu$ g), anti-CTLA4 (9D9, mIgG2a isotype, 50  $\mu$ g), anti-PD1 (200  $\mu$ g), anti-RANKL (200  $\mu$ g) or indicated combinations Three days after treatment, tumors were harvested and processed for flow cytometry gating on live CD45.2 cells of leukocyte morphology. **A:** Wet masses of CT26 s.c. tumors at day 13 after tumor inoculation according to indicated treatment group, with four experiments combined. Statistical differences in tumor mass were determined by Kruskal-Wallis test with Dunn's post-test (\*\*p< 0.01, \*\*\*\*p< 0.0001). # indicates the following significant comparisons for both clg and anti-RANKL: \*\* (vs anti-CTLA4 + anti-RANKL), \*\* (vs anti-PD1 + anti-CTLA4), \*\*\*\* (vs anti-PD1 + anti-CTLA4 + anti-RANKL). **B:** Representative FACS contour plots for tumors included in Figure 5A, gated on CD8<sup>+</sup> T cell TILs. **C:** Representative FACS contour plots for tumors included in Figure 5B, gated on CD4<sup>+</sup> T cell TILs. **D:** Representative FACS contour plots for tumors included in Figure 5C, gated on CD8<sup>+</sup> T cell TILs.

**Supplementary Figure S2. No significant differences in proliferative status or gp70 antigen specificity of CD8<sup>+</sup> T cell TILs with co-blockade of RANKL with PD-1 and CTLA4.** Groups of BALB/c WT mice (n= 5-10/group) were injected with 2

x  $10^5$  CT26 colon carcinoma cells. On day 10 after tumor inoculation, mice were randomized into groups bearing equivalent median tumor size and were treated with a single dose of antibody as indicated: clg (200  $\mu$ g), anti-CTLA4 (9D9, mIgG2a isotype, 50  $\mu$ g), anti-PD1 (200  $\mu$ g), anti-RANKL (200  $\mu$ g) or indicated combinations. Mice were culled on day 13 after tumor inoculation and their tumors were harvested and processed for flow cytometry. Mean  $\pm$  SEM proportion of **(A)** CD8<sup>+</sup> T cell TILs of total live single CD45.2<sup>+</sup> cells, **(B)** CD8<sup>+</sup> T cell TILs positive for Ki67, and **(C)** CD8<sup>+</sup> T cell TILs positive for gp70 tetramer are shown. Data pooled from three experiments.

**Supplementary Figure S3. Anti-RANKL when combined with immune checkpoint blockade may modulate PD-L1 expression.** For experiment depicted in Figure 6E, representative FACS contour plots for CT26 tumors depicted for indicated treatment groups.

**Supplementary Figure S4. RANKL identifies PD1<sup>hi</sup> expressing T cells whose PD1 expression can be modulated.** **(A-F)** Groups of BALB/c wild type (WT) mice (n=10/group) were injected s.c. with  $2 \times 10^5$  CT26 colon carcinoma cells. On day 10 after tumor inoculation, mice were randomized into groups bearing equivalent median tumor size and were treated i.p. with a single dose of antibody as indicated: clg (200  $\mu$ g), anti-CTLA4 (9D9, mIgG2a isotype, 50  $\mu$ g), anti-PD1 (200  $\mu$ g) or the indicated combinations. Three days after treatment, tumors were harvested and processed for flow cytometry gating on live CD45.2 cells of leukocyte morphology. **(A)** Proportion of RANKL<sup>+</sup> (black bars) or RANKL<sup>-</sup> (grey bars) CD8<sup>+</sup> T cell TILs expressing PD1, **(B)** expression level of PD1 (expressed as geometric MFI, gMFI) by RANKL<sup>+</sup> (black bars) or RANKL<sup>-</sup> (grey bars) CD8<sup>+</sup> T cell TILs, and **(C)** proportion of RANKL<sup>+</sup> (black bars) or

RANKL<sup>-</sup> (grey bars) CD8<sup>+</sup> T cell TILs expressing Ki67 displayed for indicated treatment groups. (D) expression level of PD1 (expressed as geometric MFI, gMFI) by RANKL<sup>+</sup> (black bars) or RANKL<sup>-</sup> (grey bars) gp70-specific CD8<sup>+</sup> T cell TILs displayed for indicated treatment groups. (E) proportion of RANKL<sup>+</sup> (black bars) or RANKL<sup>-</sup> (grey bars) CD4<sup>+</sup> T cell TILs expressing PD1, and (F) expression level of PD1 (gMFI) by RANKL<sup>+</sup> (black bars) or RANKL<sup>-</sup> (grey bars) CD4<sup>+</sup> T cell TILs displayed for indicated treatment groups. Means  $\pm$  SEM are shown. Statistical differences were determined by one way ANOVA with Tukey's post-test analysis, except in (C), where Mann-Whitney test was used to compare within-treatment groups (\*p < 0.05, \*\*p < 0.01, \*\*\*p < 0.001, \*\*\*\*p < 0.0001).

**Supplementary Figure S5. PD1, CTLA4 and RANKL co-expression on gp70**

**tetramer specific CD8<sup>+</sup> cells.** For experiments depicted in Figure 6A-C, representative dot plots of CD8<sup>+</sup> T cell TILs for CT26 tumors depicted for indicated treatment groups.
