# Supplementary material
Source: PubMed Central journal article supplement (PMC5980384)

# Supp. Fig. S1

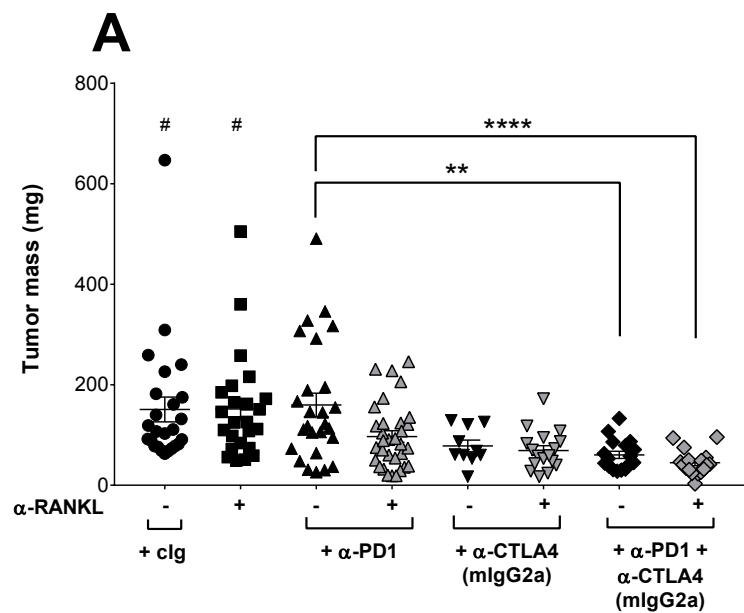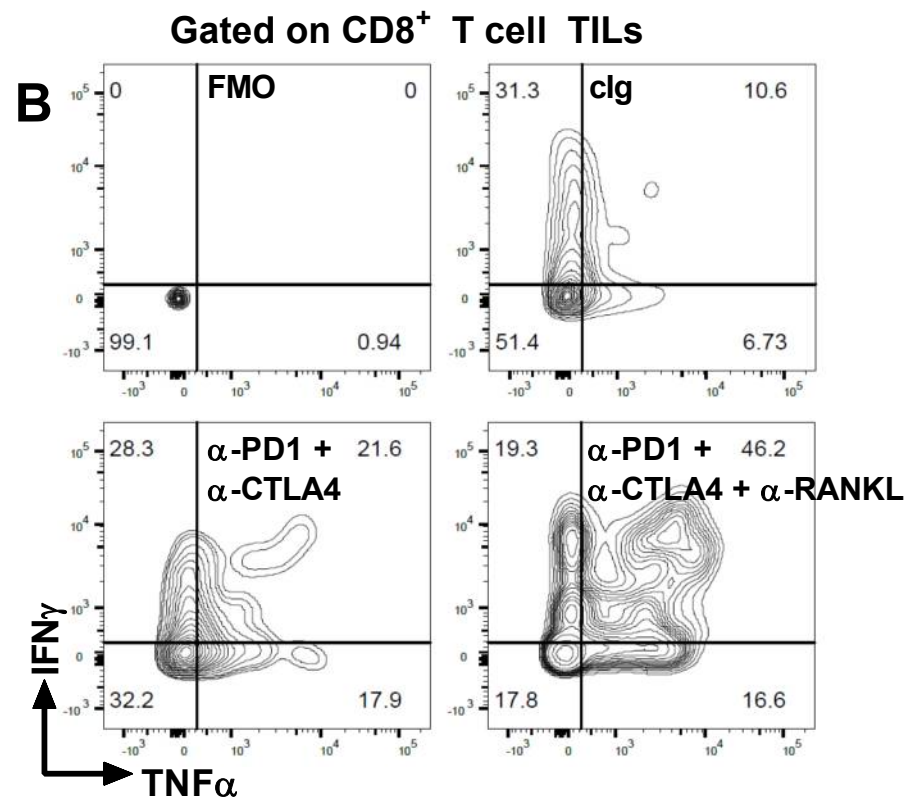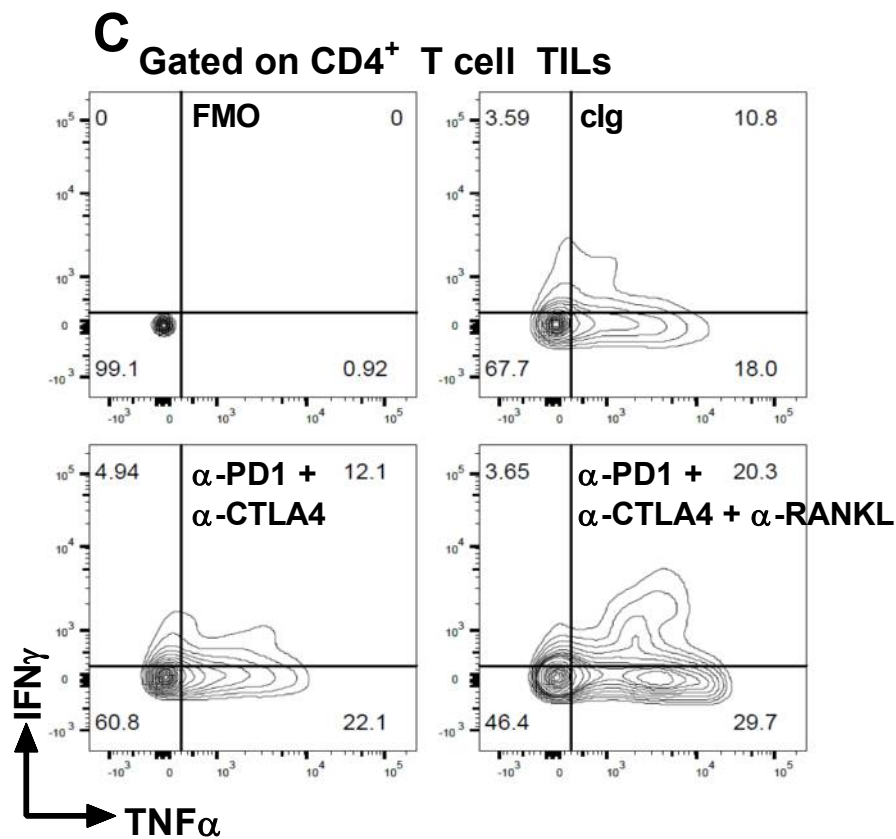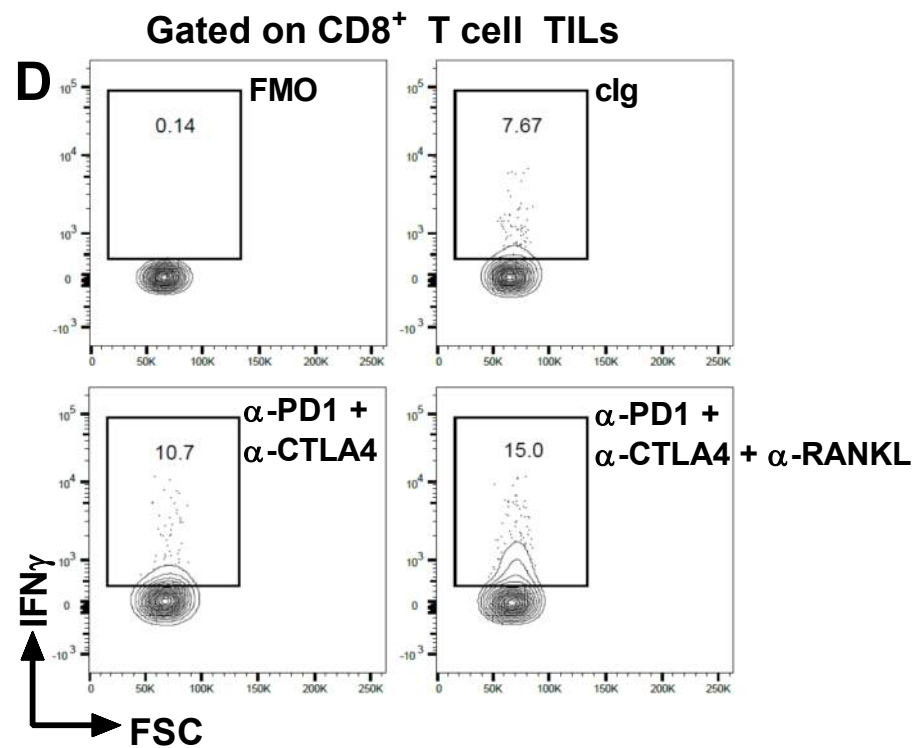

# Supp. Fig. S2

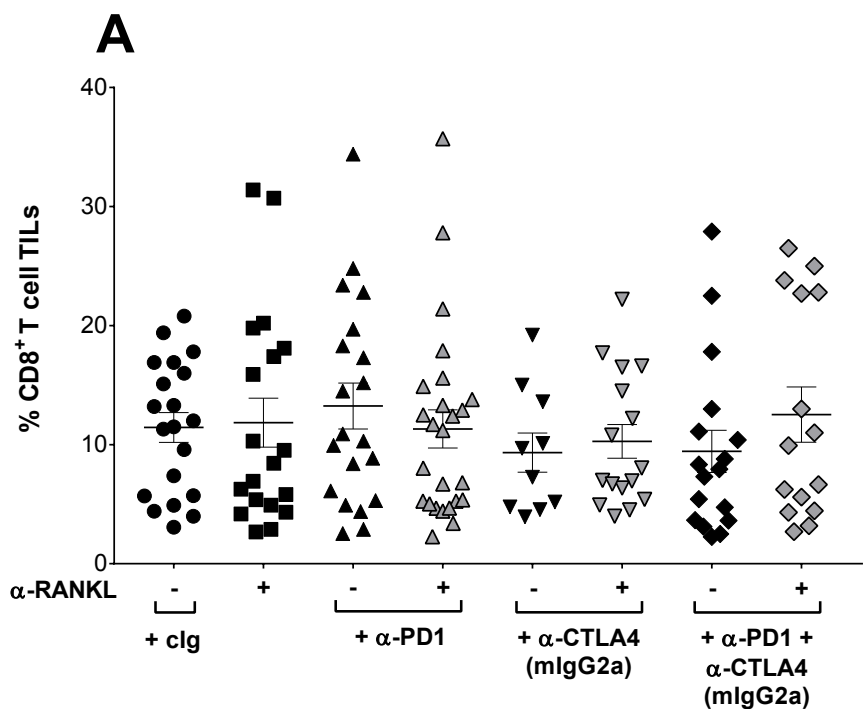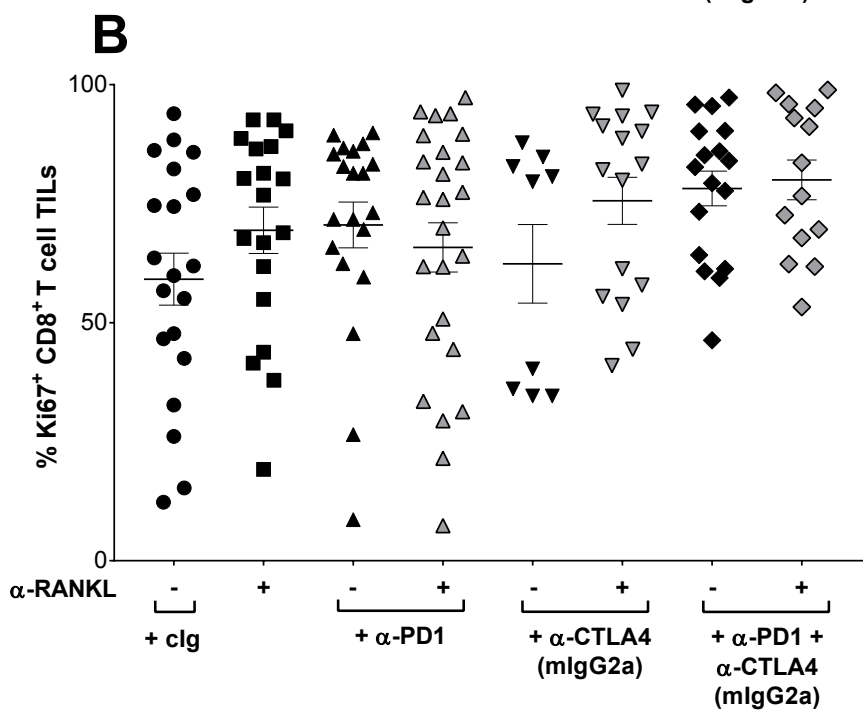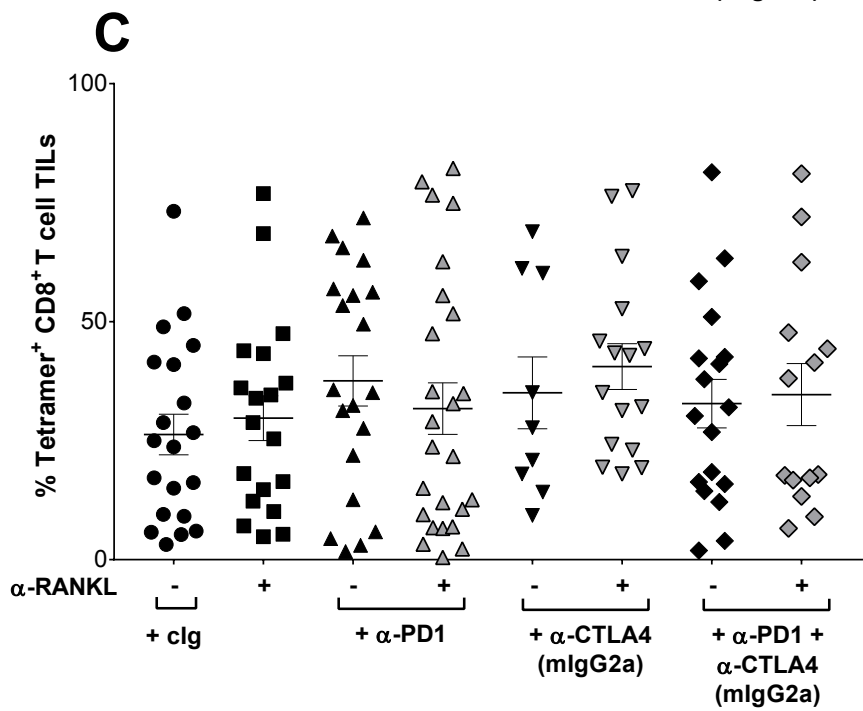

# Supp. Fig. S3

## Gated on non-lymphoid cells

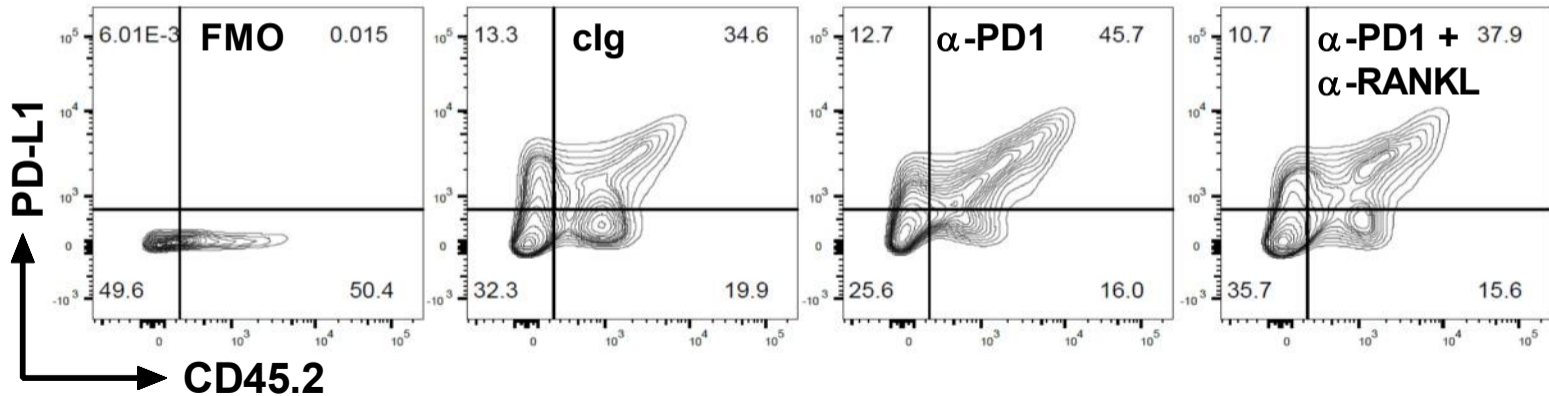

# Supp. Fig. S4

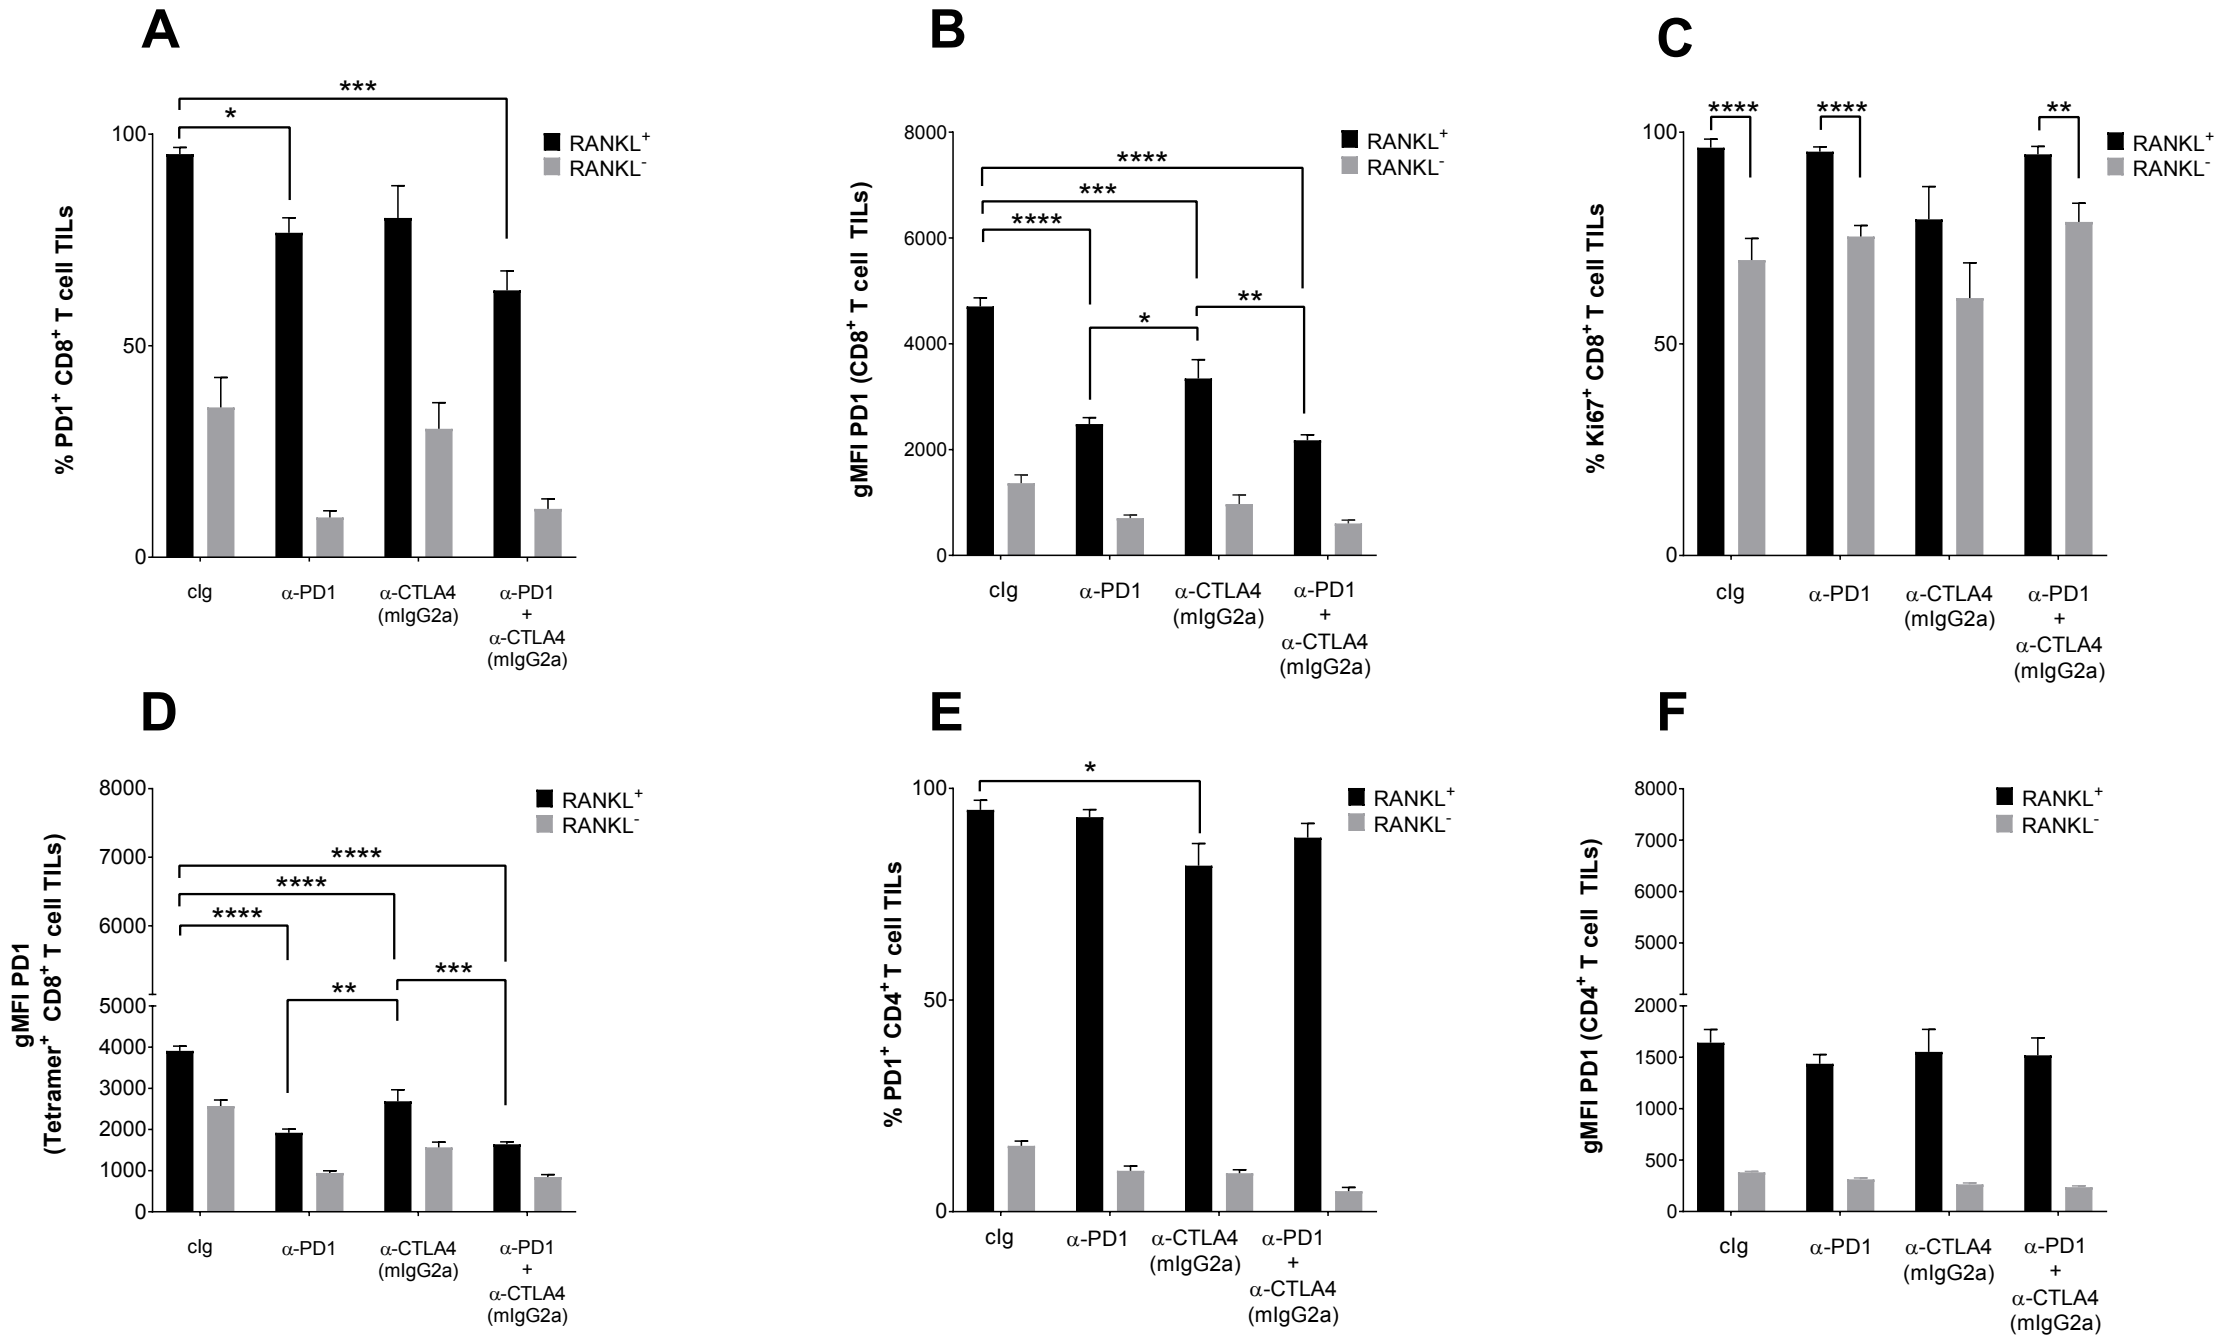

Supp. Fig. S5

Gated on CD8<sup>+</sup> T cell TILs

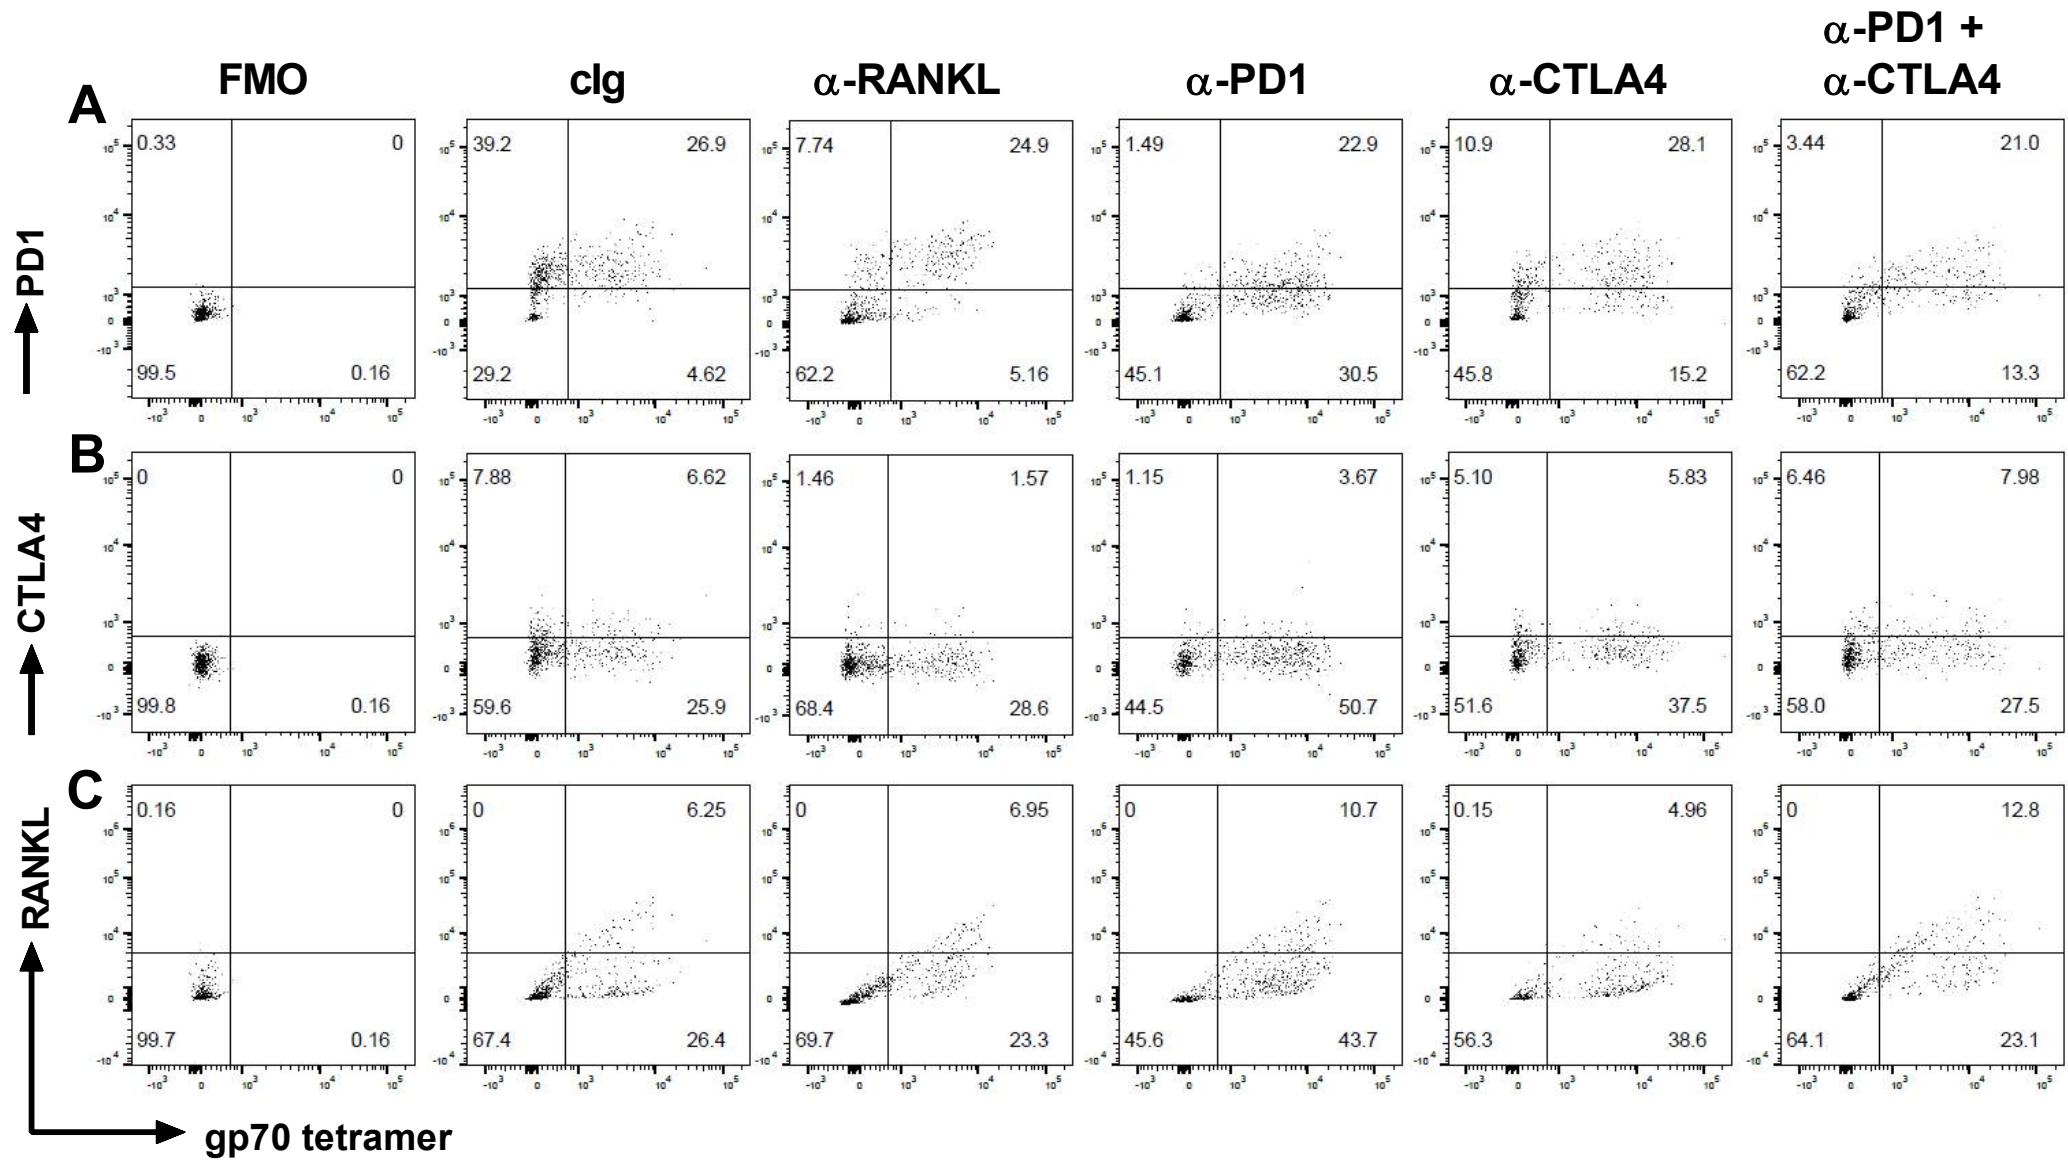

Supplement: koni-07-06-1431088-s002.pdf [file koni-07-06-1431088-s002.pdf]
